# Supplementary material for: BBIBP-CorV Vaccination against the SARS-CoV-2 Virus Affects the Gut Microbiome
Source: Vaccines (Basel). 2023 May 4;11(5):942. doi: 10.3390/vaccines11050942 (PMC10223200; doi:10.3390/vaccines11050942)
Supplement: Supplementary file 1 [file vaccines-11-00942-s001.zip › vaccines-2359210-supplementary.pdf]

## Supplementary materials

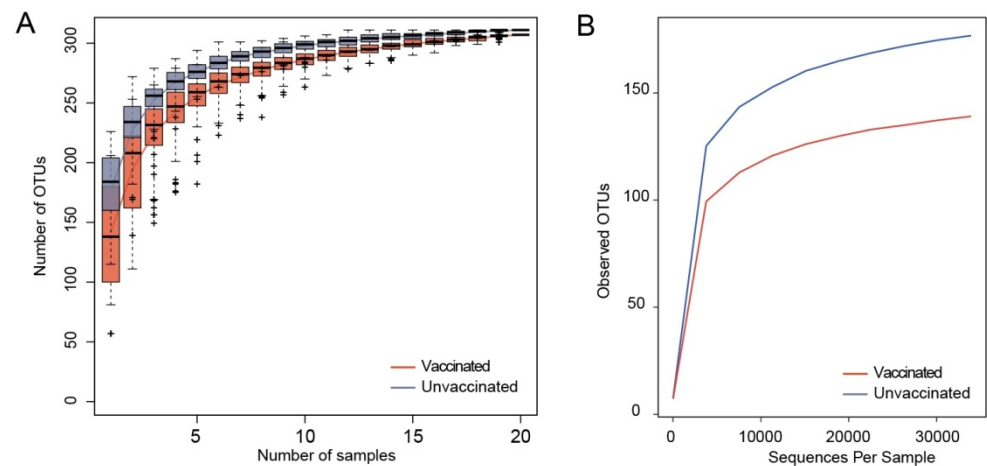

**Figure S1. Rarefaction curves validating the adequate sample size and sequencing depth in each group.** (A) Rarefaction curves were constructed by randomly sampling various individuals from the cohort and examining numbers detected in these individuals. When the curves were flat, they indicated that the sample size was sufficient and reasonable. (B) Rarefaction curves performed when gradually expanding the sequencing depth by random sampling. When the curves approach saturation as the sample sequencing depth increases, the amount of sequencing data is sufficient and stable.

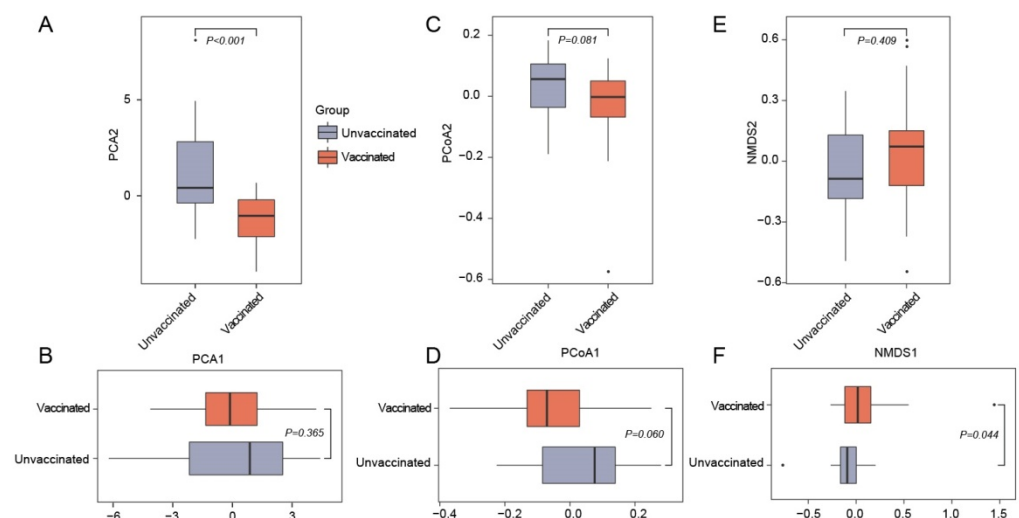

**Figure S2.** The distribution of  $\beta$ -diversity plots at axes based on genera profiles in vaccinated and unvaccinated participants. (A–B)  $\beta$ -diversity scatter plots distribution at the first and second PCA axes.  $P=0.365$  for PCA1 axis;  $P<0.001$  for PCA2 axis. (C–D) Elevation for the distribution of samples at the first and second PCoA axes.  $P=0.06$  for PCoA1 axis;  $P=0.081$  for PCoA2 axis. (E–F) Comparison of the features of each group at the first and second NMDS axes.  $P=0.044$  for the NMDS1 axis;  $P=0.041$  for the NMDS2 axis. The boxes represent the interquartile ranges, the inside lines represent the median, and the points are outliers.  $P$ -values were obtained using pairwise Wilcoxon tests.

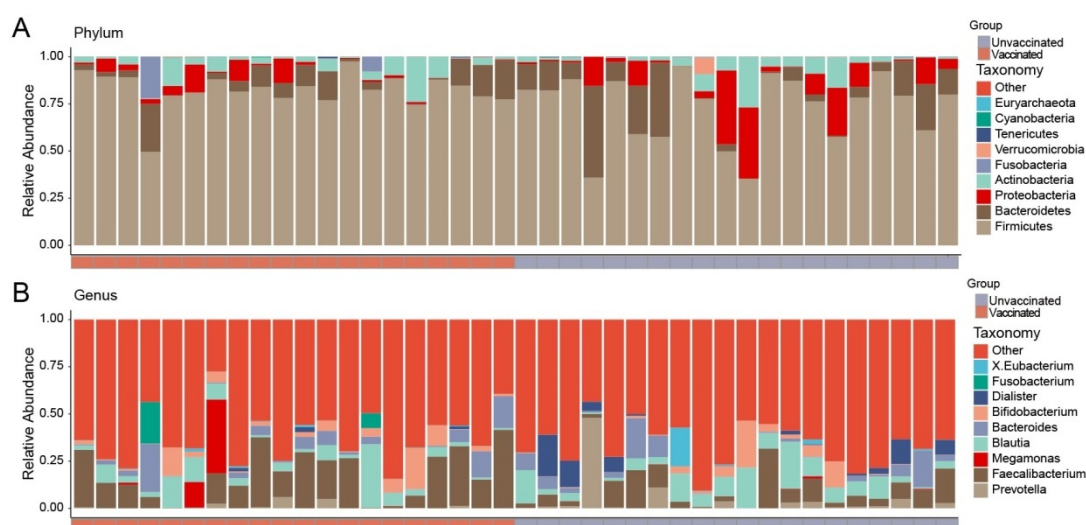

**Figure S3.** Relative abundance of the top 10 phyla and genera annotated in the stool of each sample. **(A)** Bar plots showing the relative abundance and proportion of the top 10 most abundant phyla in each sample. **(B)** The relative abundance and proportion of the top 10 most dominant genera are described in each sample. Other in Figure S3A and S3B indicate the sum of all the other phyla/genera, excluding the top 10 phyla/genera.

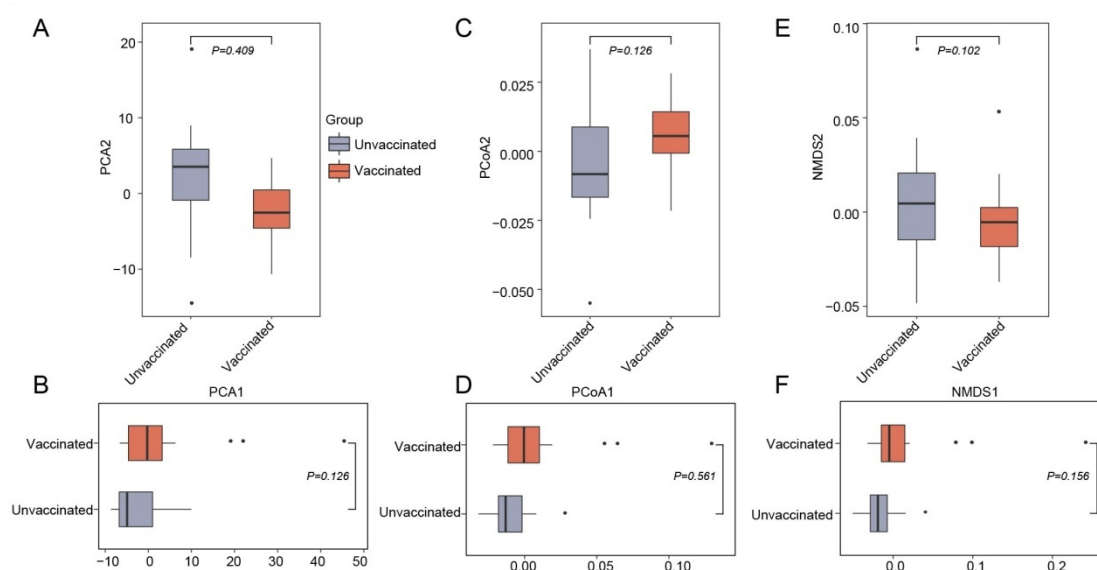

**Figure S4.** Assessment of the distribution of the  $\beta$ -diversity plots at axes based on the relative abundance of KEGG pathways in unvaccinated and vaccinated individuals. **(A-B)** Scatter plots distribution of  $\beta$ -diversity at the first and second PCA axes.  $P=0.126$  for PCA1 axis;  $P=0.409$  for PCA2 axis. **(C-D)** Elevation of the sample distribution at the first and second PCoA axes.  $P=0.561$  for PCoA1 axis;  $P=0.126$  for PCoA2 axis. **(E-F)** Comparison of the separation of each group at the first and second NMDS axes.  $P=0.156$  for the NMDS1 axis;  $P=0.102$  for the NMDS2 axis. The boxes represent the interquartile ranges, the inside lines represent the median, and the points are outliers. P-values were obtained using pairwise Wilcoxon tests.

**Table S1.** Data production of the study cohort.

| Group        | Sample ID       | Raw PE(#) | Raw Tags(#) | Clean Tags(#) | Effective Tags(#) | Base(nt)   | Avglen (nt) | Q20    | Q30    | GC%    | Effective % |
|--------------|-----------------|-----------|-------------|---------------|-------------------|------------|-------------|--------|--------|--------|-------------|
| Unvaccinated | Unvaccinated-1  | 151,881   | 148,481     | 126,404       | 121,645           | 53,482,439 | 439         | 98.81% | 95.59% | 53.22% | 80.09%      |
|              | Unvaccinated-2  | 158,961   | 154,448     | 146,629       | 138,561           | 57,710,807 | 416         | 98.40% | 94.58% | 53.14% | 87.17%      |
|              | Unvaccinated-3  | 108,198   | 105,444     | 100,518       | 97,573            | 41,033,861 | 420         | 98.55% | 94.88% | 53.44% | 90.18%      |
|              | Unvaccinated-4  | 142,179   | 138,297     | 132,119       | 127,604           | 53,681,792 | 420         | 98.43% | 94.52% | 51.12% | 89.75%      |
|              | Unvaccinated-5  | 155,290   | 151,164     | 143,791       | 135,522           | 56,597,934 | 417         | 98.43% | 94.61% | 54.14% | 87.27%      |
|              | Unvaccinated-6  | 79,471    | 77,239      | 73,621        | 70,163            | 29,072,041 | 414         | 98.41% | 94.51% | 53.60% | 88.29%      |
|              | Unvaccinated-7  | 184,965   | 177,578     | 165,061       | 156,959           | 63,444,127 | 404         | 98.16% | 93.65% | 54.11% | 84.86%      |
|              | Unvaccinated-8  | 174,875   | 170,437     | 161,825       | 158,598           | 66,616,916 | 420         | 98.53% | 94.75% | 53.48% | 90.69%      |
|              | Unvaccinated-9  | 80,338    | 78,486      | 71,223        | 70,484            | 30,315,202 | 430         | 98.64% | 95.10% | 52.84% | 87.73%      |
|              | Unvaccinated-10 | 171,673   | 166,814     | 158,949       | 152,744           | 63,605,358 | 416         | 98.40% | 94.50% | 53.30% | 88.97%      |
|              | Unvaccinated-11 | 138,472   | 135,012     | 128,696       | 123,844           | 51,896,548 | 419         | 98.48% | 94.65% | 52.85% | 89.44%      |
|              | Unvaccinated-12 | 101,496   | 99,531      | 94,966        | 89,318            | 37,655,838 | 421         | 98.58% | 94.93% | 52.79% | 88.00%      |
|              | Unvaccinated-13 | 130,400   | 127,602     | 109,029       | 105,428           | 46,304,033 | 439         | 98.82% | 95.62% | 52.77% | 80.85%      |
|              | Unvaccinated-14 | 164,469   | 159,532     | 133,193       | 125,884           | 55,289,058 | 439         | 98.65% | 95.19% | 52.92% | 76.54%      |
|              | Unvaccinated-15 | 145,755   | 142,081     | 134,883       | 132,470           | 55,564,027 | 419         | 98.47% | 94.72% | 53.85% | 90.89%      |
|              | Unvaccinated-16 | 146,214   | 141,565     | 133,165       | 128,517           | 53,418,632 | 415         | 98.32% | 94.24% | 54.25% | 87.90%      |
|              | Unvaccinated-17 | 131,088   | 127,101     | 120,027       | 117,164           | 48,567,037 | 414         | 98.33% | 94.33% | 53.70% | 89.38%      |
|              | Unvaccinated-18 | 176,407   | 172,685     | 164,948       | 152,996           | 64,519,522 | 421         | 98.57% | 94.87% | 52.54% | 86.73%      |
|              | Unvaccinated-19 | 166,076   | 162,551     | 154,867       | 148,144           | 62,628,776 | 422         | 98.56% | 94.85% | 51.94% | 89.20%      |
|              | Unvaccinated-20 | 116,013   | 113,693     | 108,410       | 101,728           | 42,968,280 | 422         | 98.57% | 94.80% | 52.20% | 87.69%      |
| Vaccinated   | Vaccinated-1    | 74,259    | 73,603      | 69,779        | 62,238            | 26,913,427 | 432         | 98.33% | 97.46% | 52.61% | 83.81%      |
|              | Vaccinated-2    | 53,294    | 52,858      | 47,821        | 46,341            | 20,263,686 | 437         | 97.62% | 96.23% | 52.95% | 86.95%      |
|              | Vaccinated-3    | 63,757    | 62,114      | 57,798        | 56,651            | 23,390,006 | 412         | 96.86% | 93.33% | 53.09% | 88.85%      |
|              | Vaccinated-4    | 60,550    | 59,878      | 55,358        | 54,841            | 24,235,892 | 441         | 98.03% | 95.63% | 52.40% | 90.57%      |
|              | Vaccinated-5    | 47,019    | 46,358      | 42,243        | 40,003            | 16,843,021 | 421         | 96.72% | 94.89% | 52.87% | 85.08%      |
|              | Vaccinated-6    | 62,291    | 61,372      | 58,047        | 52,675            | 22,445,514 | 426         | 97.44% | 96.15% | 52.19% | 84.56%      |
|              | Vaccinated-7    | 73,183    | 72,235      | 68,149        | 64,109            | 27,713,513 | 432         | 97.95% | 96.92% | 52.05% | 87.60%      |
|              | Vaccinated-8    | 91,038    | 90,423      | 86,073        | 75,439            | 33,169,042 | 439         | 98.67% | 97.88% | 53.36% | 82.87%      |
|              | Vaccinated-9    | 81,527    | 80,946      | 77,076        | 69,547            | 30,353,239 | 436         | 98.75% | 98.02% | 54.36% | 85.31%      |
|              | Vaccinated-10   | 78,192    | 77,483      | 73,267        | 66,502            | 29,499,739 | 443         | 98.42% | 97.51% | 54.67% | 85.05%      |
|              | Vaccinated-11   | 87,882    | 87,194      | 82,499        | 77,366            | 34,373,545 | 444         | 98.64% | 97.80% | 55.44% | 88.03%      |
|              | Vaccinated-12   | 89,023    | 88,365      | 84,437        | 71,629            | 31,018,019 | 433         | 98.46% | 97.63% | 53.28% | 80.46%      |
|              | Vaccinated-13   | 117,645   | 116,064     | 111,699       | 107,722           | 45,959,445 | 426         | 98.68% | 95.23% | 53.49% | 91.57%      |
|              | Vaccinated-14   | 67,535    | 66,791      | 63,428        | 58,414            | 25,462,120 | 435         | 98%    | 96.88% | 54.13% | 86.49%      |
|              | Vaccinated-15   | 100,787   | 99,919      | 95,144        | 83,970            | 37,072,973 | 441         | 98.40% | 97.47% | 54.67% | 83.31%      |
|              | Vaccinated-16   | 92,242    | 90,882      | 86,470        | 83,630            | 35,526,005 | 424         | 97.65% | 96.41% | 53.42% | 90.66%      |
|              | Vaccinated-17   | 100,557   | 99,682      | 94,528        | 87,322            | 37,865,627 | 433         | 98.48% | 97.66% | 53.23% | 86.84%      |
|              | Vaccinated-18   | 112,463   | 110,934     | 105,487       | 97,534            | 41,679,947 | 427         | 97.73% | 96.56% | 52.58% | 86.73%      |
|              | Vaccinated-19   | 47,773    | 46,935      | 42,815        | 40,560            | 16,801,489 | 414         | 96.11% | 94.02% | 52.32% | 84.90%      |
|              | Vaccinated-20   | 48,747    | 48,191      | 43,576        | 42,420            | 18,337,617 | 432         | 97.46% | 96%    | 52.92% | 87.02%      |
